# Supplementary material
Source: Springer Nature journal article supplement (https://www.springermedizin.de/resource/supplementary/12889_2011_4989_MOESM1_ESM.pdf/9492760)

**Brands**

**Virginia  
Slims  
Silver**

**Peel  
Sweet  
Melon**

**John  
Player  
Special  
Pink  
American  
Blend**

**Benson &  
Hedges  
Superslim  
Filter 100s  
Park  
Avenue**

**DJ Mix  
Strawberry  
Flavour  
Special  
Feel**

**Silk Cut  
Superslims  
Menthol**

**Dunhill  
Carlton  
Carlton  
Mint  
Blend**

**Capri  
Baunilha**

**Vogue  
Bleue**

**Marlboro  
Filter  
Cigarette  
Gold  
Original**

**Condition 1**

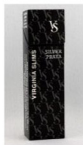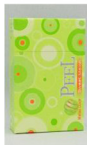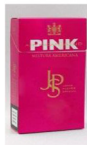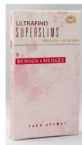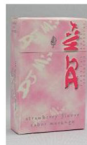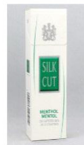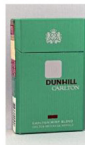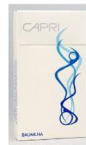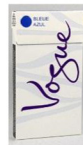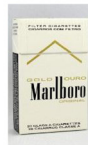

**Condition 2**

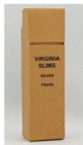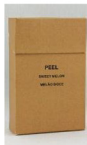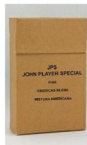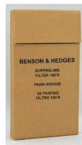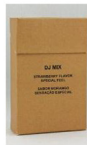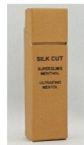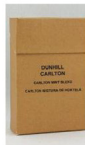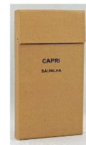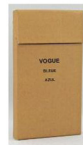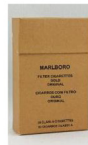

**Condition 3**

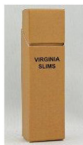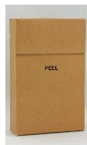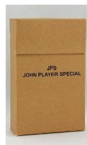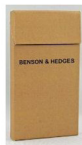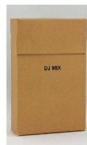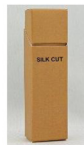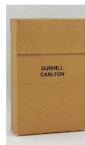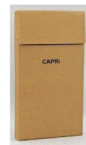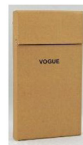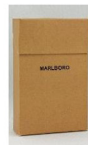

Supplement: MOESM1 [file 9492760]
